# Supplementary material
Source: MDPI journal article supplement (https://www.mdpi.com/2073-4352/12/8/1020)
Supplement: s1 [file s1]

# DFT–assisted Structure Determination from Powder X-Ray Diffraction Data of a new Zonisamide/ε-caprolactam Cocrystal

Rafael Barbas,<sup>a</sup> Anna Portell,<sup>a</sup> Rafel Prohens<sup>a\*</sup> and Antonio Frontera<sup>b\*</sup>

<sup>a</sup> Unitat de Polimorfisme i Calorimetria, Centres Científics i Tecnològics, Universitat de Barcelona, Baldori Reixac 10, 08028 Barcelona, Spain.

<sup>b</sup> Department of Chemistry, Universitat de les Illes Balears, Ctra. de Valldemossa km 7.5, 07122 Palma, Spain

## Electronic Supplementary Information

|                                             |    |
|---------------------------------------------|----|
| 1. Materials and experimental methods ..... | 2  |
| 2. Mogul analysis.....                      | 4  |
| 3. Rietveld refinements plots .....         | 7  |
| 4. Relevant H-bond distances .....          | 15 |
| 5. RMSD values.....                         | 18 |
| 6. QTAIM.....                               | 19 |

# 1. Materials and experimental methods

## 1.1 Materials

### 1.1.1. Zonisamide

Zonisamide used in this study corresponds to its anhydrous crystal form, Figure S1.

**Figure S1:** Comparative XRPD diffractograms of zonisamide powder used as starting material (blue) and simulated from the cif: zonisamide (CCDC refcode: VUXPUZ) (red)

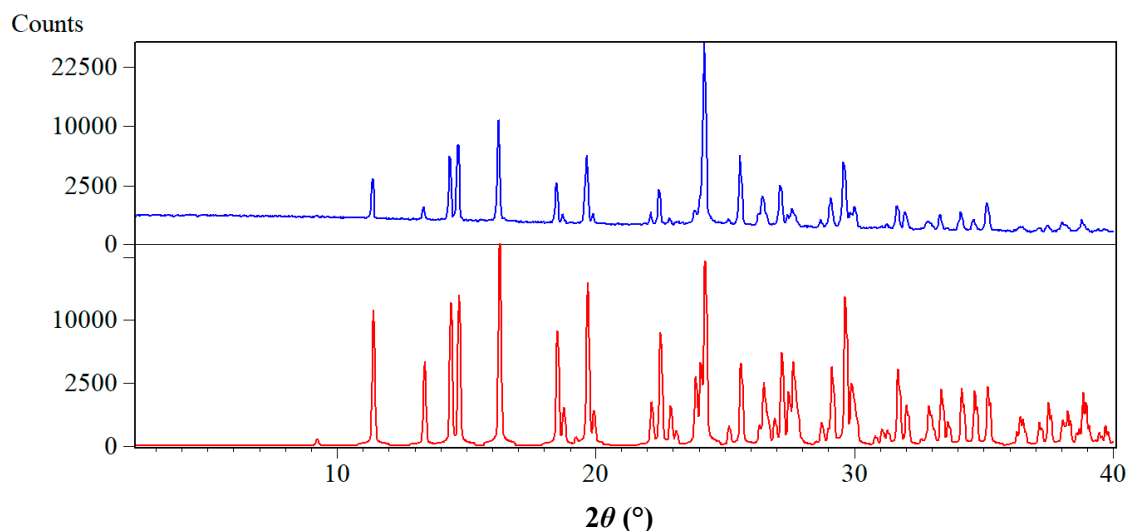

### 1.1.2 Experimental methods

The formation of a new cocrystal was determined by comparing XRPD patterns of starting materials and product from cocrystal screening LAG experiment (Figure S2).

**Figure S2:** Comparative XRPD diffractograms of zonisamide bulk powder (blue),  $\epsilon$ -caprolactam bulk powder polymorph I (according to the simulated from cif file: CCDC refcode: CAPLAC16) (green),  $\epsilon$ -caprolactam polymorph II (simulated from cif file: CCDC refcode: CAPLAC18) (red) and zonisamide/  $\epsilon$ -caprolactam cocrystal (black).

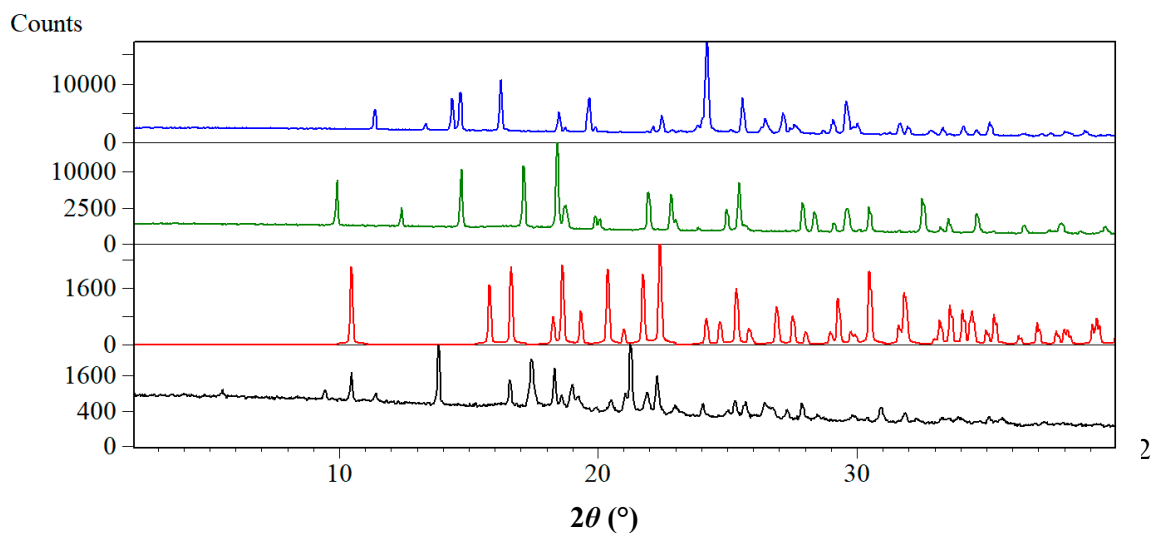

**Figure S3:** The XRPD of zonisamide/ε-caprolactam cocrystal has been indexed with the following proposed monoclinic cell values:  $a = 32.150(4) \text{ \AA}$ ,  $b = 5.3272(5) \text{ \AA}$ ,  $c = 18.730(2) \text{ \AA}$ ,  $\beta = 95.623(6)^\circ$ ,  $V = 3192.5(6) \text{ \AA}^3$ , (Figures of Merit:  $M_{20} = 11.9$ ,  $F_{20} = 33.3$  (0.0078, 77), with number of impurities equal to zero. A  $C 2/c$  space group is compatible with the cell and the cell volume is compatible with 8 molecules of zonisamide and 8 molecules of ε-caprolactam. ( $R_{wp} = 4.18\%$ ,  $R_p = 2.46\%$  and),  $Z=8$ ,  $Z'=1$ .

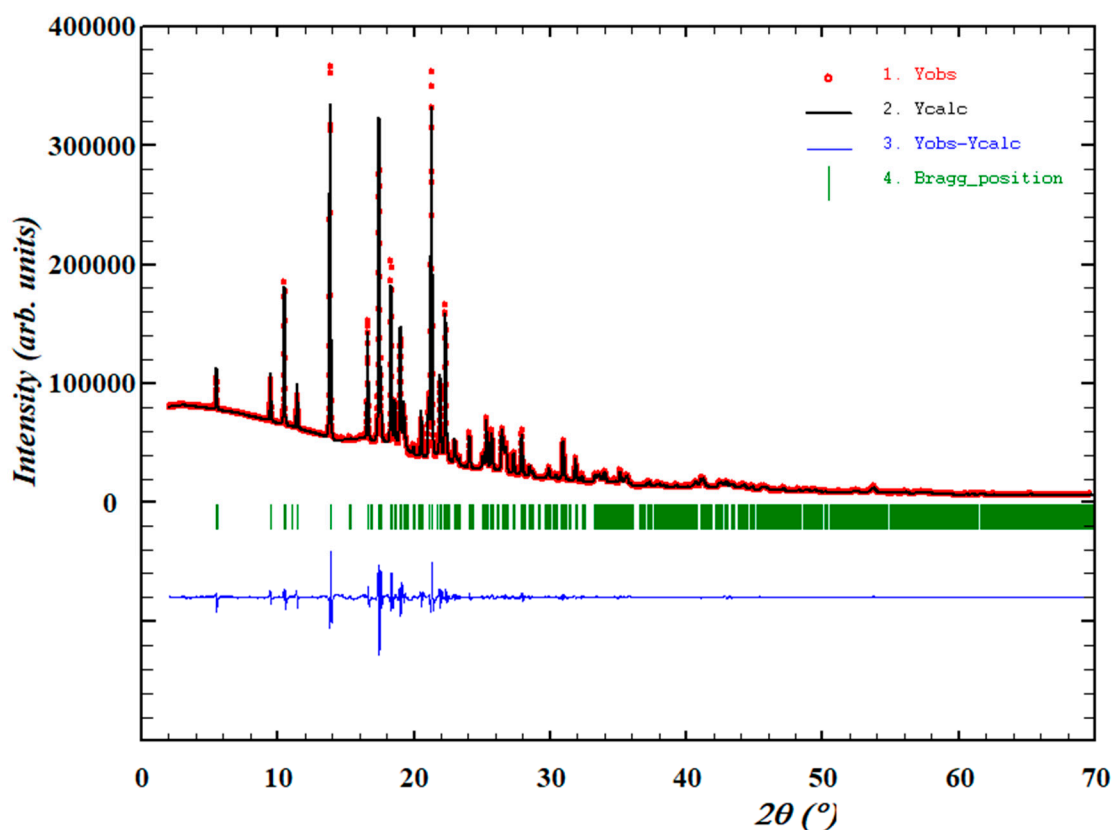

## 2. Mogul analysis

**Figure S4:** Label atom representation corresponding to the asymmetric unit of zonisamide/  $\epsilon$ -caprolactam cocrystal.

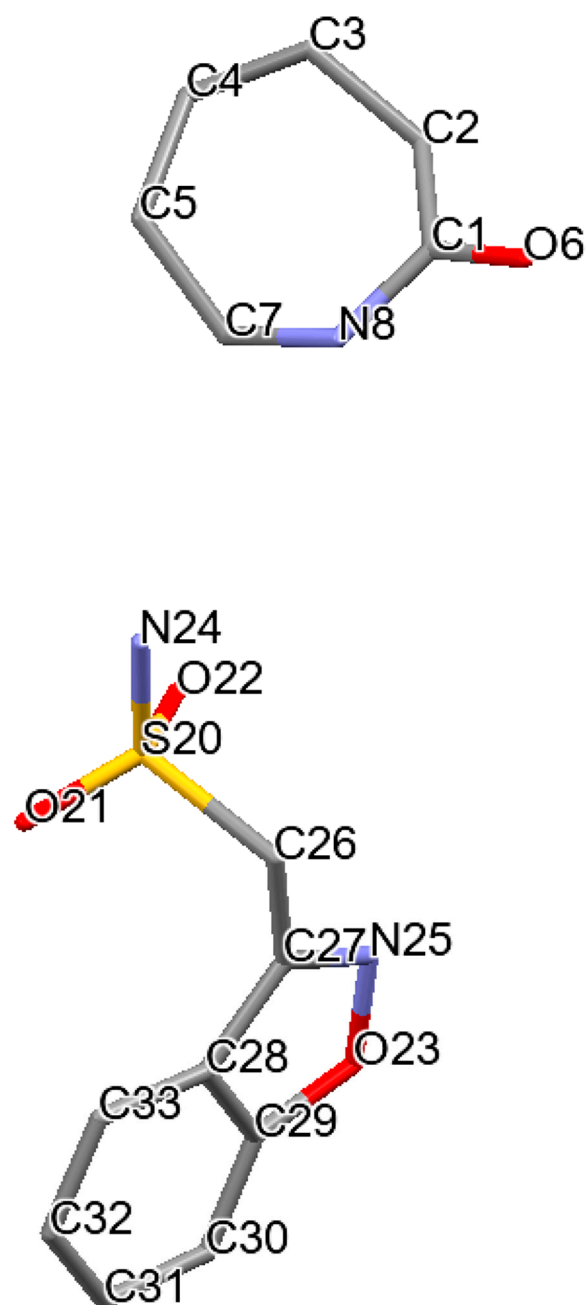

**Table S1.** The bond distances of the structural models of zonisamide/ε-caprolactam cocrystal were restrained based on the values reported in the CSD, analyzed with Mogul. In blue median values according to Mogul analysis, in red unusual values, in purple worsening values and in green improving values respect to median Mogul values, respectively. Only significant bonds distances are included ( $|z\text{-score}| > 2.0$ ).

| Mogul: 500 hits |        |         |         |       |        |           | best FOX           |             | initial optimized structure |             | optimization step 9 |             | optimization step 10 |             | optimization step 11 |             | optimization step 20 |             |
|-----------------|--------|---------|---------|-------|--------|-----------|--------------------|-------------|-----------------------------|-------------|---------------------|-------------|----------------------|-------------|----------------------|-------------|----------------------|-------------|
| Fragment        | Number | Minimum | Maximum | Mean  | Median | Std. dev. | $ z\text{-score} $ | Query value | $ z\text{-score} $          | Query value | $ z\text{-score} $  | Query value | $ z\text{-score} $   | Query value | $ z\text{-score} $   | Query value | $ z\text{-score} $   | Query value |
| O6 C1           | 10000  | 0.978   | 1.572   | 1.228 | 1.228  | 0.020     | 0.004              | 1.228       | 0.002                       | 1.228       | 1.823               | 1.265       | 1.789                | 1.265       | 2.033                | 1.269       | 2.098                | 1.271       |
| C33 C28         | 10000  | 1.160   | 1.672   | 1.394 | 1.394  | 0.016     | 0.853              | 1.408       | 0.856                       | 1.408       | 0.308               | 1.399       | 0.643                | 1.405       | 0.368                | 1.389       | 0.126                | 1.396       |
| C30 C29         | 10000  | 1.108   | 1.605   | 1.391 | 1.389  | 0.021     | 0.188              | 1.395       | 0.193                       | 1.395       | 0.537               | 1.403       | 0.186                | 1.395       | 0.452                | 1.401       | 0.038                | 1.392       |
| C31 C30         | 10000  | 0.755   | 1.691   | 1.385 | 1.385  | 0.021     | 0.716              | 1.400       | 0.719                       | 1.400       | 0.233               | 1.390       | 0.623                | 1.398       | 0.164                | 1.388       | 0.153                | 1.388       |
| C32 C31         | 10000  | 0.588   | 1.729   | 1.376 | 1.378  | 0.027     | 0.949              | 1.401       | 0.952                       | 1.401       | 1.316               | 1.410       | 1.078                | 1.404       | 1.318                | 1.410       | 1.225                | 1.408       |
| C32 C33         | 10000  | 0.755   | 1.691   | 1.385 | 1.385  | 0.021     | 0.937              | 1.404       | 0.942                       | 1.405       | 0.107               | 1.387       | 0.078                | 1.383       | 0.022                | 1.384       | 0.111                | 1.387       |
| C4 C3           | 6543   | 1.070   | 2.054   | 1.513 | 1.520  | 0.042     | 0.320              | 1.526       | 0.321                       | 1.526       | 0.091               | 1.517       | 0.410                | 1.530       | 0.297                | 1.525       | 0.362                | 1.528       |
| C5 C4           | 6543   | 1.070   | 2.054   | 1.513 | 1.520  | 0.042     | 0.405              | 1.530       | 0.407                       | 1.530       | 0.291               | 1.525       | 0.036                | 1.515       | 0.271                | 1.524       | 0.387                | 1.529       |
| C3 C2           | 1726   | 1.058   | 1.680   | 1.522 | 1.528  | 0.032     | 0.023              | 1.523       | 0.025                       | 1.523       | 0.660               | 1.543       | 0.655                | 1.543       | 0.764                | 1.547       | 0.734                | 1.546       |
| C28 C29         | 1318   | 1.325   | 1.548   | 1.391 | 1.391  | 0.013     | 0.428              | 1.386       | 0.423                       | 1.386       | 0.367               | 1.396       | 0.865                | 1.402       | 1.327                | 1.408       | 0.628                | 1.399       |
| C7 N8           | 526    | 1.334   | 1.591   | 1.462 | 1.463  | 0.020     | 0.878              | 1.444       | 0.876                       | 1.444       | 0.663               | 1.475       | 0.055                | 1.463       | 0.349                | 1.469       | 0.310                | 1.468       |
| C5 C7           | 433    | 1.300   | 1.661   | 1.510 | 1.515  | 0.030     | 0.474              | 1.524       | 0.476                       | 1.524       | 0.617               | 1.528       | 0.855                | 1.535       | 0.718                | 1.531       | 0.644                | 1.529       |
| C27 N25         | 228    | 1.238   | 1.605   | 1.281 | 1.280  | 0.025     | 2.503              | 1.344       | 1.372                       | 1.316       | 1.703               | 1.324       | 1.946                | 1.330       | 1.590                | 1.321       | 1.649                | 1.322       |
| C2 C1           | 146    | 1.440   | 1.601   | 1.503 | 1.505  | 0.018     | 0.402              | 1.510       | 0.407                       | 1.510       | 0.443               | 1.511       | 0.129                | 1.505       | 0.404                | 1.495       | 0.198                | 1.506       |
| O23 N25         | 100    | 1.410   | 1.469   | 1.431 | 1.431  | 0.010     | 4.102              | 1.389       | 2.414                       | 1.406       | 0.421               | 1.426       | 2.311                | 1.407       | 1.315                | 1.417       | 1.180                | 1.419       |
| C1 N8           | 93     | 1.298   | 1.417   | 1.333 | 1.330  | 0.019     | 1.582              | 1.362       | 1.585                       | 1.362       | 1.607               | 1.363       | 0.340                | 1.339       | 1.422                | 1.359       | 0.536                | 1.343       |
| O23 C29         | 75     | 1.341   | 1.398   | 1.358 | 1.358  | 0.009     | 0.562              | 1.363       | 1.043                       | 1.367       | 0.593               | 1.363       | 3.016                | 1.384       | 2.240                | 1.378       | 1.284                | 1.369       |
| C28 C27         | 38     | 1.411   | 1.485   | 1.448 | 1.442  | 0.022     | 1.201              | 1.421       | 1.122                       | 1.423       | 0.785               | 1.430       | 1.131                | 1.423       | 0.569                | 1.435       | 0.960                | 1.426       |
| S20 N24         | 23     | 1.550   | 1.643   | 1.594 | 1.599  | 0.023     | 4.536              | 1.489       | 4.532                       | 1.489       | 1.838               | 1.636       | 2.345                | 1.648       | 1.837                | 1.636       | 1.317                | 1.624       |
| O21 S20         | 18     | 1.426   | 1.441   | 1.434 | 1.434  | 0.005     | 0.962              | 1.429       | 0.949                       | 1.429       | 3.470               | 1.452       | 4.546                | 1.458       | 2.081                | 1.445       | 3.377                | 1.451       |
| O22 S20         | 18     | 1.426   | 1.441   | 1.434 | 1.434  | 0.005     | 3.739              | 1.453       | 3.753                       | 1.453       | 2.666               | 1.448       | 3.775                | 1.454       | 2.990                | 1.449       | 3.591                | 1.453       |
| C26 S20         | 15     | 1.768   | 1.807   | 1.785 | 1.783  | 0.009     | 7.790              | 1.715       | 7.783                       | 1.715       | 4.885               | 1.829       | 3.063                | 1.812       | 3.695                | 1.818       | 4.298                | 1.823       |
| C26 C27         | 10     | 1.482   | 1.513   | 1.498 | 1.496  | 0.010     | 5.378              | 1.443       | 3.377                       | 1.463       | 1.412               | 1.483       | 1.316                | 1.484       | 0.050                | 1.497       | 2.370                | 1.474       |

**Table S2.** The angles of the structural models of zonisamide/ε-caprolactam cocrystal were restrained based on the values reported in the CSD, analyzed with Mogul. In blue median values according to Mogul analysis, in red unusual values, in purple worsening values and in green improving values respect to median Mogul values, respectively. Only significant angles are included ( $|z\text{-score}| > 2.0$ ).

| Mogul: 500 hits |        |         |         |         |         |           | best FOX           |             | initial optimized structure |             | optimization step 9 |             | optimization step 10 |             | optimization step 11 |             | optimization step 20 |             |
|-----------------|--------|---------|---------|---------|---------|-----------|--------------------|-------------|-----------------------------|-------------|---------------------|-------------|----------------------|-------------|----------------------|-------------|----------------------|-------------|
| Fragment        | Number | Minimum | Maximum | Mean    | Median  | Std. dev. | $ z\text{-score} $ | Query value | $ z\text{-score} $          | Query value | $ z\text{-score} $  | Query value | $ z\text{-score} $   | Query value | $ z\text{-score} $   | Query value | $ z\text{-score} $   | Query value |
| C31 C30 C29     | 10000  | 93.781  | 134.994 | 119.712 | 119.877 | 1.839     | 1.980              | 116.072     | 1.979                       | 116.073     | 2.709               | 114.732     | 1.905                | 116.210     | 1.774                | 116.450     | 2.321                | 115.444     |
| C32 C31 C30     | 10000  | 62.866  | 142.195 | 120.190 | 120.180 | 1.523     | 0.702              | 121.259     | 0.701                       | 121.258     | 1.253               | 122.098     | 0.703                | 121.260     | 1.007                | 121.725     | 1.556                | 122.561     |
| C31 C32 C33     | 10000  | 62.866  | 142.195 | 120.190 | 120.180 | 1.523     | 0.615              | 121.127     | 0.616                       | 121.128     | 1.167               | 121.968     | 1.344                | 122.237     | 0.761                | 121.349     | 0.598                | 121.101     |
| C32 C33 C28     | 10000  | 78.949  | 132.751 | 119.815 | 120.039 | 1.891     | 0.773              | 118.354     | 0.772                       | 118.354     | 1.541               | 116.901     | 1.464                | 117.047     | 1.198                | 117.548     | 1.426                | 117.118     |
| C5 C4 C3        | 2669   | 94.080  | 156.910 | 116.338 | 115.538 | 4.216     | 0.448              | 114.450     | 0.448                       | 114.450     | 0.861               | 112.709     | 1.061                | 111.866     | 1.171                | 111.403     | 0.779                | 113.056     |
| C4 C3 C2        | 1397   | 94.129  | 135.037 | 114.740 | 114.482 | 2.575     | 0.478              | 113.509     | 0.479                       | 113.507     | 0.844               | 112.567     | 0.928                | 112.349     | 0.984                | 112.207     | 0.837                | 112.585     |
| C30 C29 C28     | 1044   | 109.818 | 129.897 | 123.596 | 123.747 | 1.163     | 0.765              | 124.487     | 0.766                       | 124.487     | 0.354               | 124.008     | 0.764                | 122.708     | 1.591                | 121.745     | 0.533                | 122.976     |
| C33 C28 C29     | 774    | 111.857 | 126.590 | 118.883 | 118.843 | 1.176     | 0.154              | 118.701     | 0.156                       | 118.699     | 0.978               | 120.033     | 1.243                | 120.345     | 1.782                | 120.978     | 1.611                | 120.777     |
| C5 C7 N8        | 410    | 98.297  | 129.771 | 114.017 | 113.906 | 2.600     | 0.424              | 112.914     | 0.425                       | 112.913     | 0.783               | 116.053     | 0.765                | 116.007     | 0.879                | 116.304     | 0.570                | 115.500     |
| C4 C5 C7        | 395    | 100.370 | 129.333 | 114.117 | 114.125 | 2.181     | 0.235              | 113.604     | 0.234                       | 113.606     | 1.056               | 116.420     | 1.306                | 116.965     | 1.585                | 117.574     | 1.115                | 116.549     |
| O22 S20 O21     | 164    | 114.187 | 129.658 | 119.323 | 119.207 | 1.415     | 8.659              | 107.070     | 8.658                       | 107.071     | 1.742               | 121.788     | 1.248                | 121.089     | 0.433                | 119.935     | 0.086                | 119.201     |
| O6 C1 C2        | 146    | 109.096 | 125.387 | 121.005 | 121.286 | 2.077     | 0.334              | 121.698     | 0.334                       | 121.698     | 0.793               | 119.359     | 0.210                | 120.569     | 0.355                | 121.743     | 0.368                | 121.769     |
| C3 C2 C1        | 109    | 103.507 | 132.025 | 114.099 | 113.592 | 3.149     | 0.561              | 112.333     | 0.561                       | 112.334     | 0.489               | 115.640     | 0.475                | 115.594     | 0.581                | 115.928     | 0.284                | 114.994     |
| O6 C1 N8        | 93     | 110.765 | 126.455 | 120.576 | 120.746 | 1.744     | 0.159              | 120.299     | 0.160                       | 120.297     | 1.435               | 123.079     | 0.431                | 121.328     | 0.139                | 120.334     | 0.304                | 120.047     |
| C2 C1 N8        | 84     | 114.313 | 130.543 | 118.704 | 118.292 | 2.570     | 0.274              | 118.000     | 0.273                       | 118.001     | 0.448               | 117.553     | 0.242                | 118.083     | 0.304                | 117.923     | 0.206                | 118.174     |
| C7 N8 C1        | 84     | 105.267 | 135.230 | 126.269 | 126.052 | 3.190     | 0.221              | 126.973     | 0.220                       | 126.972     | 0.326               | 125.229     | 0.189                | 125.667     | 0.493                | 124.694     | 0.043                | 126.132     |
| C29 O23 N25     | 74     | 105.900 | 109.115 | 107.479 | 107.465 | 0.478     | 4.599              | 109.678     | 0.224                       | 107.372     | 2.794               | 108.815     | 2.216                | 108.539     | 1.318                | 108.109     | 1.655                | 108.270     |
| O23 C29 C28     | 65     | 106.666 | 111.476 | 110.296 | 110.302 | 0.655     | 1.518              | 109.301     | 1.131                       | 111.036     | 1.638               | 109.223     | 3.270                | 108.154     | 2.531                | 108.638     | 1.296                | 109.446     |
| C29 C28 C27     | 45     | 102.812 | 106.176 | 103.897 | 103.811 | 0.585     | 0.255              | 103.747     | 3.081                       | 102.095     | 0.188               | 104.007     | 1.911                | 105.014     | 1.296                | 104.654     | 0.204                | 103.777     |
| C28 C27 N25     | 43     | 110.078 | 112.349 | 111.471 | 111.556 | 0.517     | 0.506              | 111.732     | 3.169                       | 113.108     | 1.134               | 112.057     | 0.869                | 111.022     | 1.466                | 110.713     | 1.088                | 112.033     |
| C33 C28 C27     | 38     | 126.982 | 137.692 | 132.630 | 131.235 | 3.628     | 1.356              | 137.552     | 1.785                       | 139.106     | 0.908               | 135.924     | 0.545                | 134.606     | 0.468                | 134.328     | 0.774                | 135.437     |
| O23 C29 C30     | 34     | 124.044 | 128.206 | 125.890 | 126.193 | 0.925     | 0.349              | 126.212     | 1.529                       | 124.476     | 0.935               | 126.754     | 3.511                | 129.136     | 4.030                | 129.616     | 1.812                | 127.565     |
| O21 S20 C26     | 30     | 105.512 | 110.813 | 107.921 | 107.987 | 1.559     | 2.363              | 104.238     | 2.364                       | 104.236     | 0.227               | 108.275     | 0.902                | 109.327     | 1.060                | 109.574     | 0.372                | 108.501     |
| O22 S20 C26     | 30     | 105.512 | 110.813 | 107.921 | 107.987 | 1.559     | 3.969              | 114.107     | 3.969                       | 114.108     | 1.704               | 105.265     | 2.133                | 104.596     | 2.237                | 104.434     | 1.591                | 105.441     |
| O23 N25 C27     | 26     | 104.161 | 108.479 | 106.110 | 106.108 | 1.121     | 0.508              | 105.541     | 0.175                       | 106.306     | 0.298               | 105.776     | 0.968                | 107.195     | 1.519                | 107.814     | 0.312                | 106.460     |
| O21 S20 N24     | 18     | 106.264 | 111.574 | 107.817 | 107.688 | 1.146     | 2.128              | 105.378     | 2.127                       | 105.380     | 1.523               | 106.072     | 1.478                | 106.124     | 0.972                | 106.703     | 0.240                | 108.092     |
| O22 S20 N24     | 18     | 106.264 | 111.574 | 107.817 | 107.688 | 1.146     | 4.029              | 112.434     | 4.029                       | 112.433     | 0.668               | 107.051     | 0.449                | 107.302     | 0.161                | 108.001     | 0.584                | 108.486     |
| C27 C26 S20     | 18     | 109.631 | 116.333 | 113.138 | 113.296 | 2.110     | 2.261              | 108.368     | 0.790                       | 111.471     | 1.728               | 109.492     | 1.375                | 110.236     | 0.898                | 111.243     | 0.794                | 111.463     |
| C26 C27 N25     | 17     | 116.991 | 121.794 | 120.026 | 120.188 | 1.274     | 2.015              | 117.457     | 0.761                       | 119.056     | 0.054               | 119.956     | 0.224                | 119.741     | 0.413                | 120.552     | 0.236                | 120.326     |
| C26 S20 N24     | 16     | 102.276 | 109.966 | 107.129 | 107.929 | 2.060     | 2.701              | 112.692     | 2.701                       | 112.692     | 0.302               | 107.750     | 0.338                | 107.825     | 0.265                | 107.675     | 0.333                | 106.442     |
| C26 C27 C28     | 15     | 123.927 | 130.477 | 127.730 | 128.205 | 1.842     | 0.919              | 129.423     | 0.062                       | 127.615     | 0.137               | 127.982     | 0.811                | 129.223     | 0.504                | 128.658     | 0.053                | 127.632     |

### 3.- Rietveld refinements plots

**Figure S5:** Rietveld plot for the best solution of zonisamide/ $\epsilon$ -caprolactam cocrystal obtained by FOX. Agreement factors:  $R_{wp} = 8.32\%$ , Chi-square = 210. The plot shows the experimental powder XRD profile (red marks), the calculated powder XRD profile (black solid line), and the difference profile (blue, lower line). Tick marks indicate peak positions (green). Only enlargement from 4 to 40 ° in  $2\theta$  is represented to clarify.

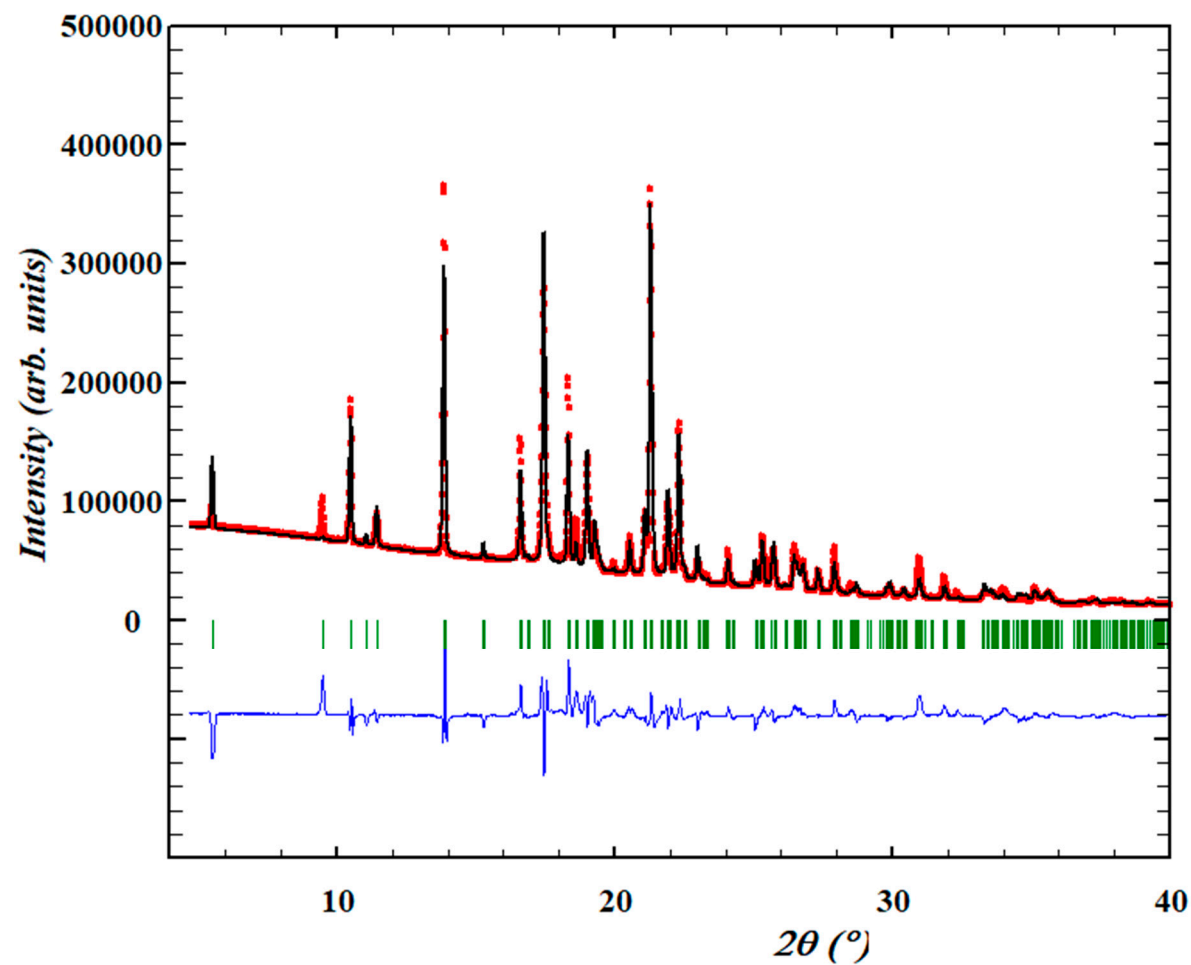

**Figure S6:** Rietveld plot for the initial structure model after some structural arrangements of the FOX best solution. Agreement factors:  $R_{wp} = 8.20\%$ , Chi-square = 204. The plot shows the experimental powder XRD profile (red marks), the calculated powder XRD profile (black solid line), and the difference profile (blue, lower line). Tick marks indicate peak positions (green). Only enlargement from 4 to 40 ° in  $2\theta$  is represented to clarify.

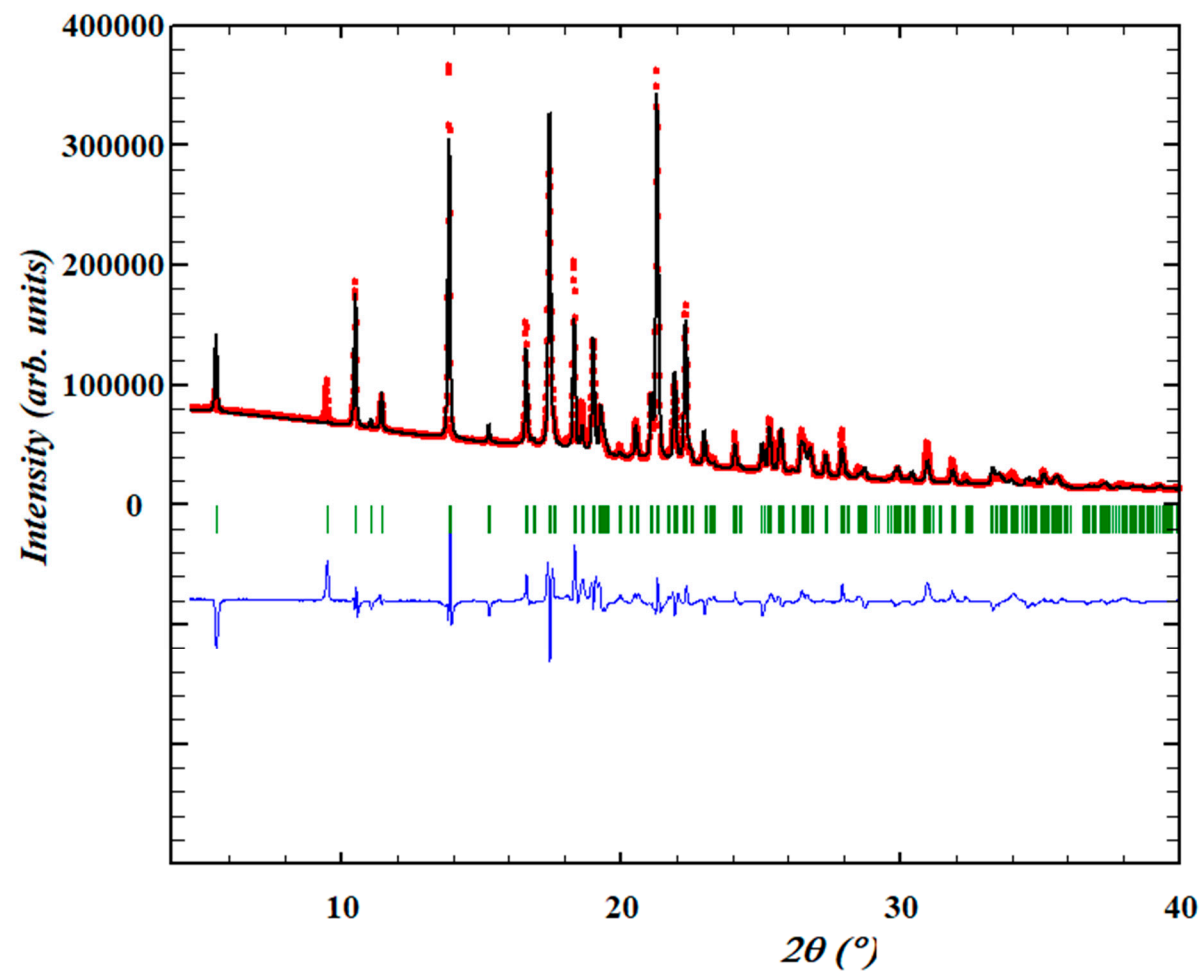



**Figure S7:** Rietveld plot for the structure model computed in the optimization step number 9. Agreement factors:  $R_{wp} = 9.06\%$ , Chi-square = 249. The plot shows the experimental powder XRD profile (red marks), the calculated powder XRD profile (black solid line), and the difference profile (blue, lower line). Tick marks indicate peak positions (green). Only enlargement from 4 to 40 ° in  $2\theta$  is represented to clarify.

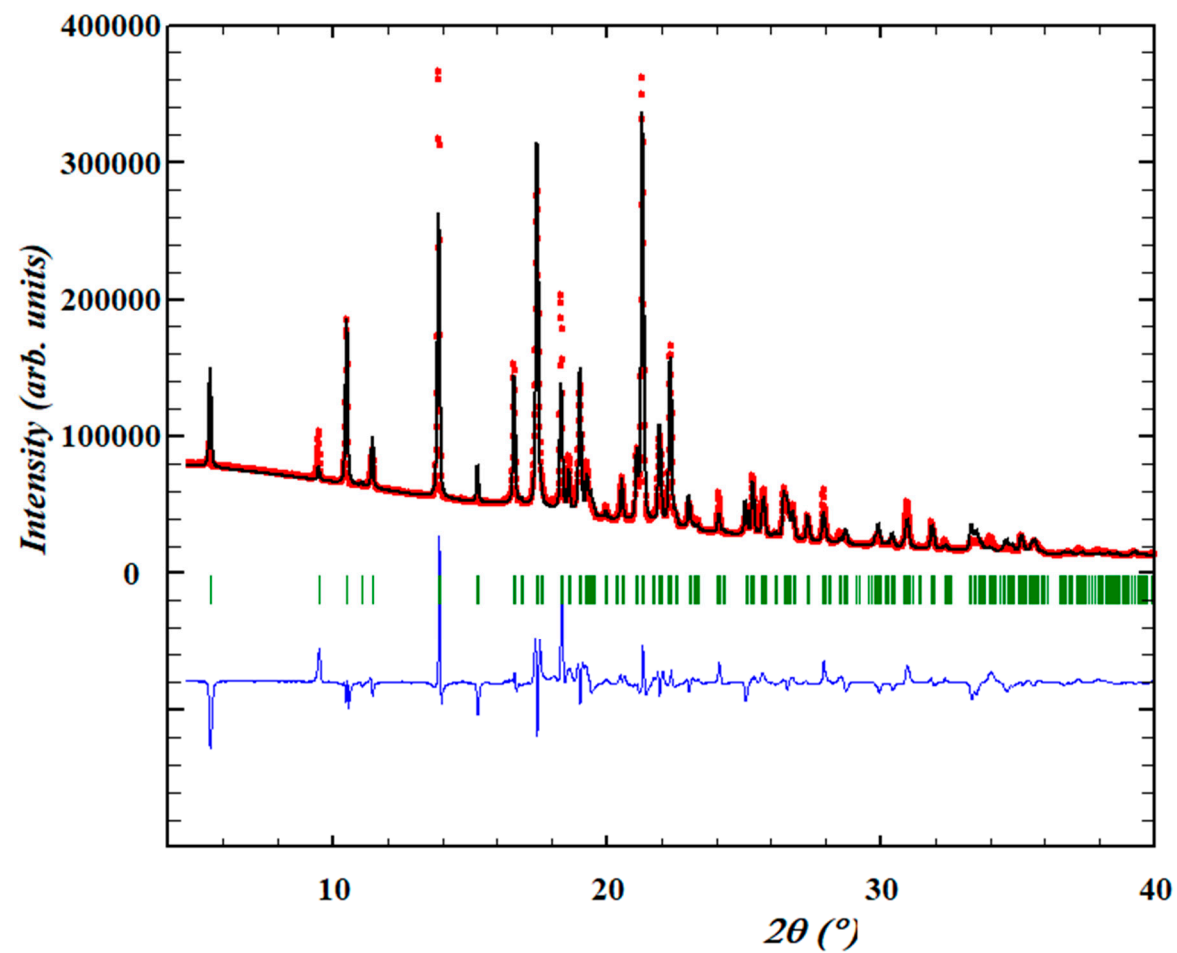

**Figure S8:** Rietveld plot for the structure model computed in the optimization step number 10. Agreement factors:  $R_{wp} = 9.26\%$ , Chi-square = 260. The plot shows the experimental powder XRD profile (red marks), the calculated powder XRD profile (black solid line), and the difference profile (blue, lower line). Tick marks indicate peak positions (green). Only enlargement from 4 to 40 ° in  $2\theta$  is represented to clarify.

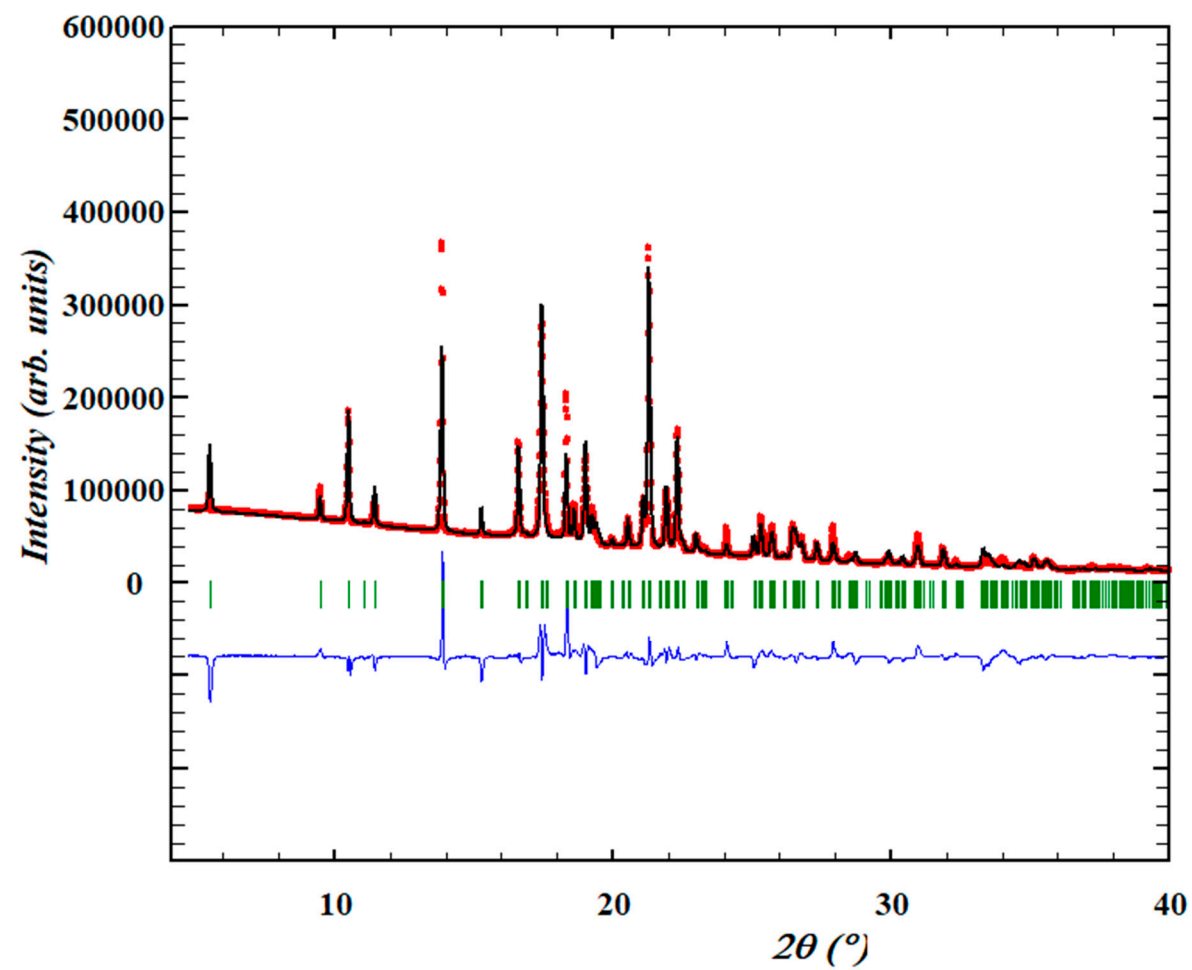

**Figure S9:** Rietveld plot for the structure model computed in the optimization step number 11. Agreement factors:  $R_{wp} = 9.66\%$ , Chi-square = 283. The plot shows the experimental powder XRD profile (red marks), the calculated powder XRD profile (black solid line), and the difference profile (blue, lower line). Tick marks indicate peak positions (green). Only enlargement from 4 to 40 ° in  $2\theta$  is represented to clarify.

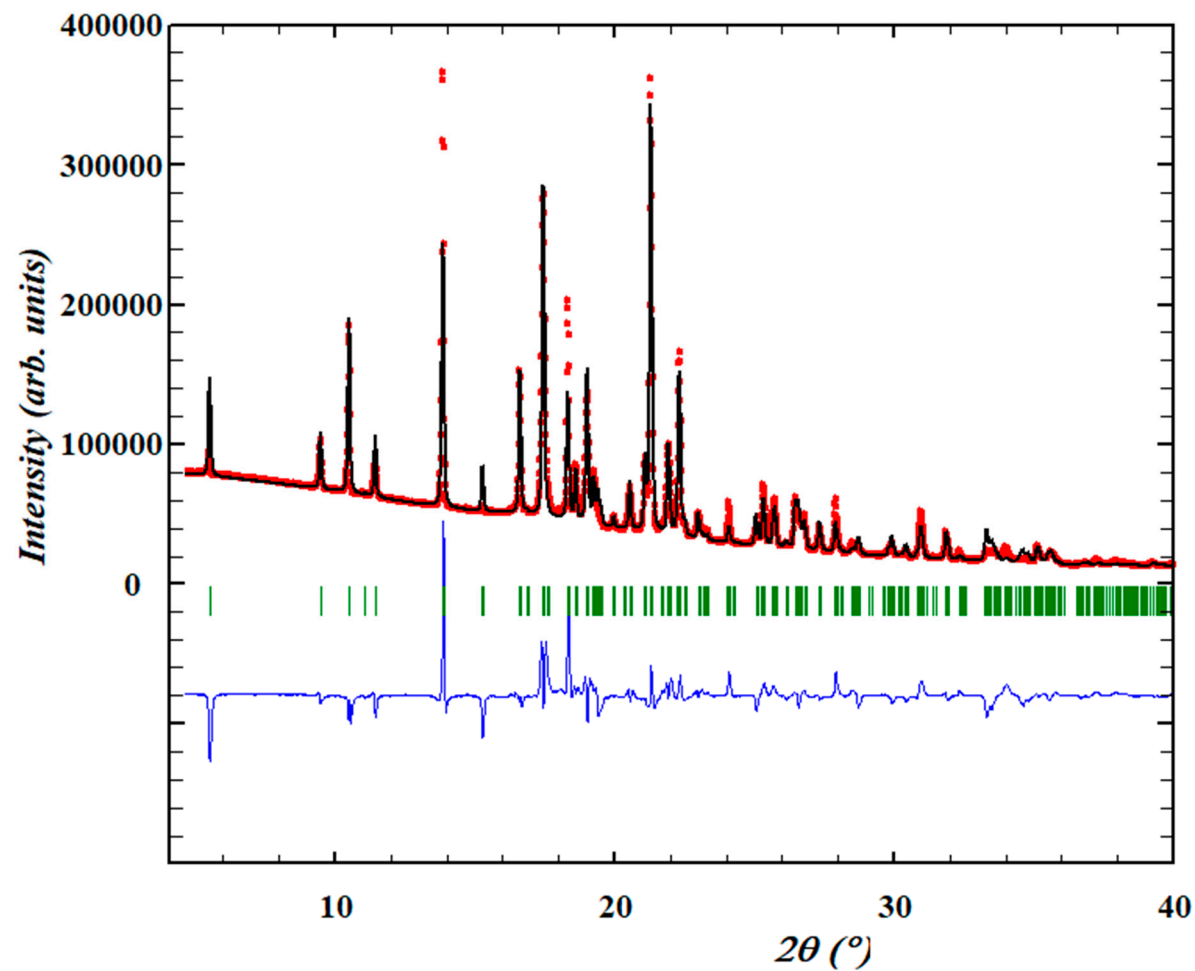

**Figure S10:** Rietveld plot for the structure model computed in the optimization step number 20. Agreement factors:  $R_{wp} = 11.5\%$ , Chi-square = 398. The plot shows the experimental powder XRD profile (red marks), the calculated powder XRD profile (black solid line), and the difference profile (blue, lower line). Tick marks indicate peak positions (green). Only enlargement from 4 to 40 ° in  $2\theta$  is represented to clarify.

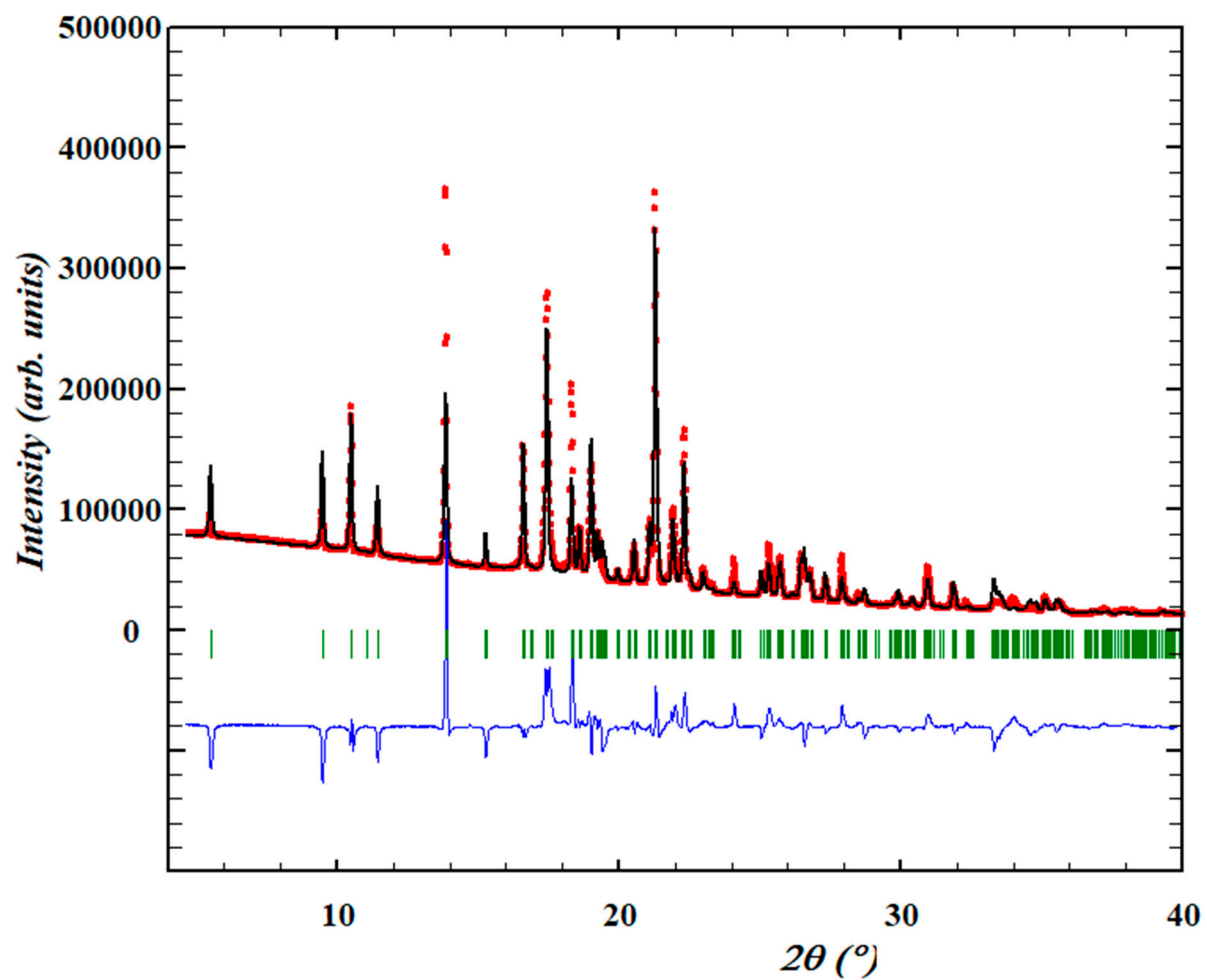

**Figure S11:** Rietveld plot for the structure model computed in the optimization step number 30. Agreement factors:  $R_{wp} = 12.7\%$ , Chi-square = 490. The plot shows the experimental powder XRD profile (red marks), the calculated powder XRD profile (black solid line), and the difference profile (blue, lower line). Tick marks indicate peak positions (green). Only enlargement from 4 to 40 ° in  $2\theta$  is represented to clarify.

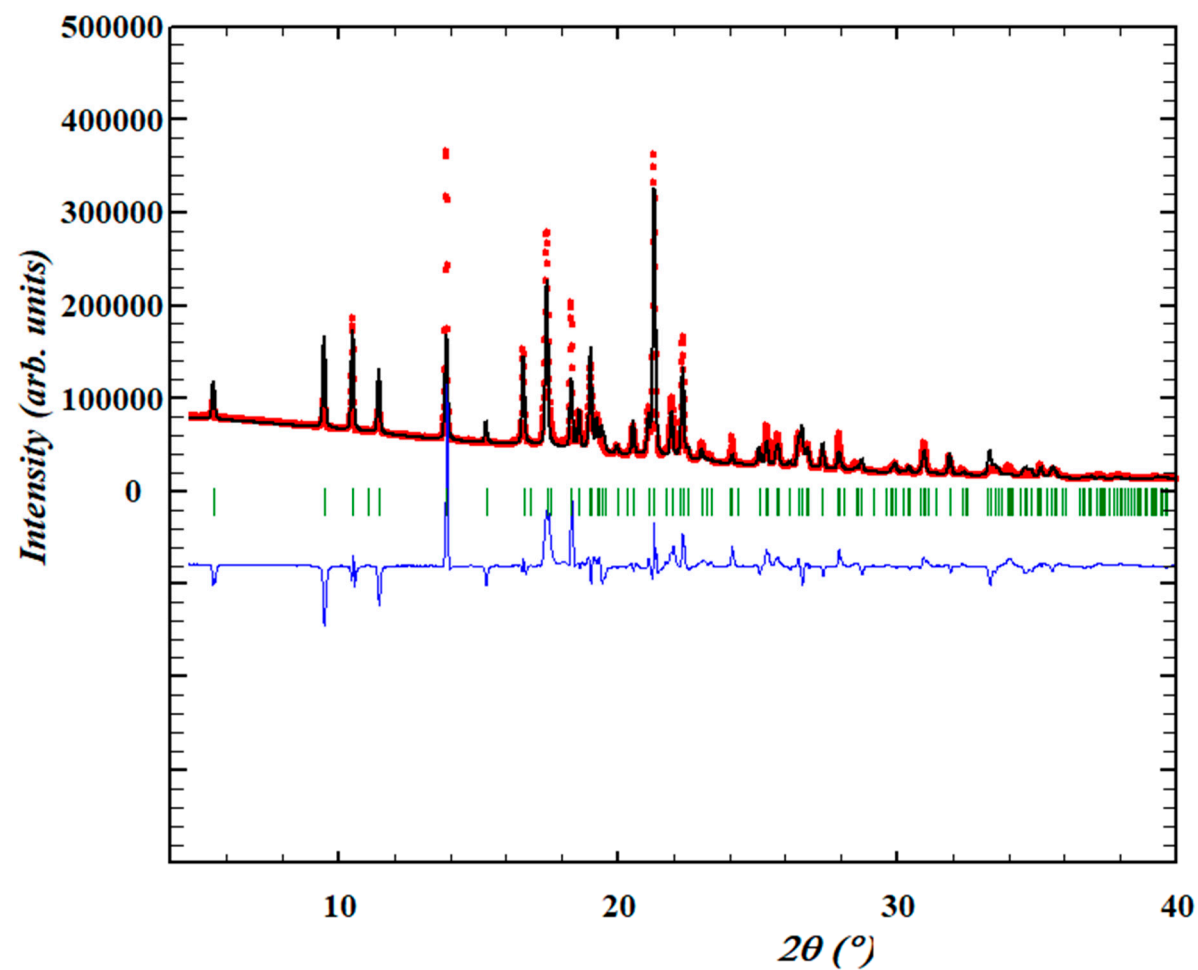

**Figure S12:** Comparison between XRPD diffractograms of bulk powder zonisamide/ $\epsilon$ -caprolactam cocrystal (black) and the calculated powder XRD profile from Rietveld refinements (structure models before (blue) and after DFT-D geometry optimization: optimization step 9 (orange), optimization step 10 (brown), optimization step 11 (green), optimization step 20 (purple) and optimization step 30 (red)). Only enlargement from 8 to 22 ° in  $2\theta$  is represented to clarify.

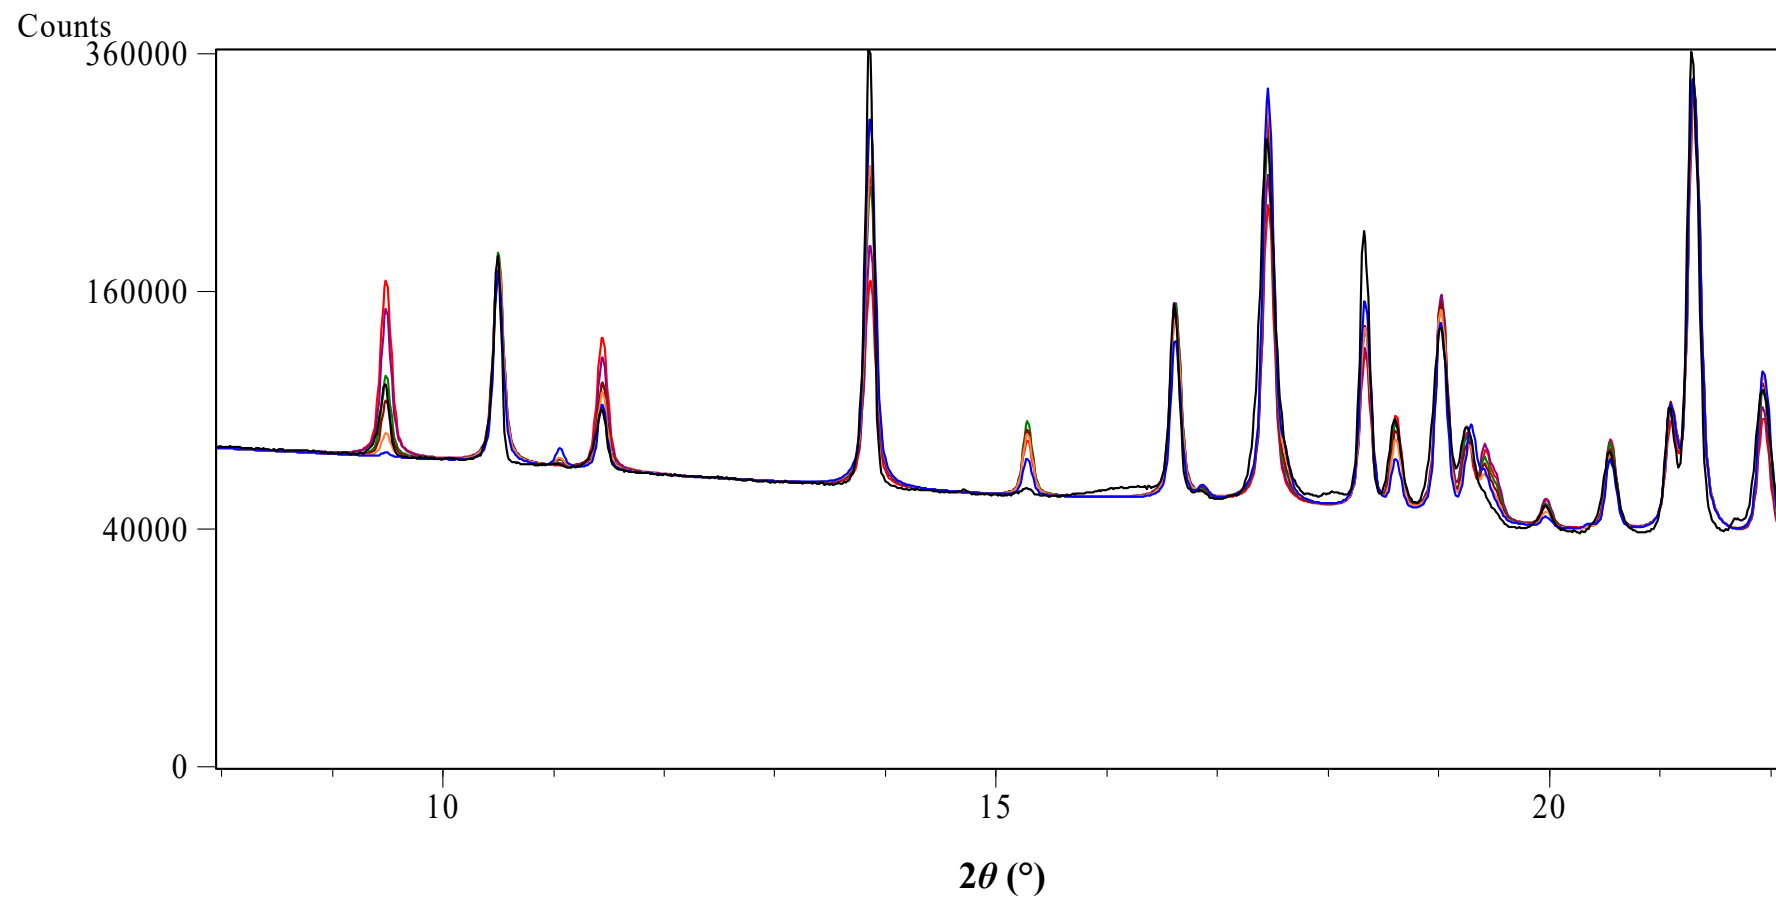

## 4.- Relevant H-bond distances

**Figure S13:** N-H...O distances of the self-assembling of  $\epsilon$ -caprolactam dimer reported in the CCDC at 298-303 K

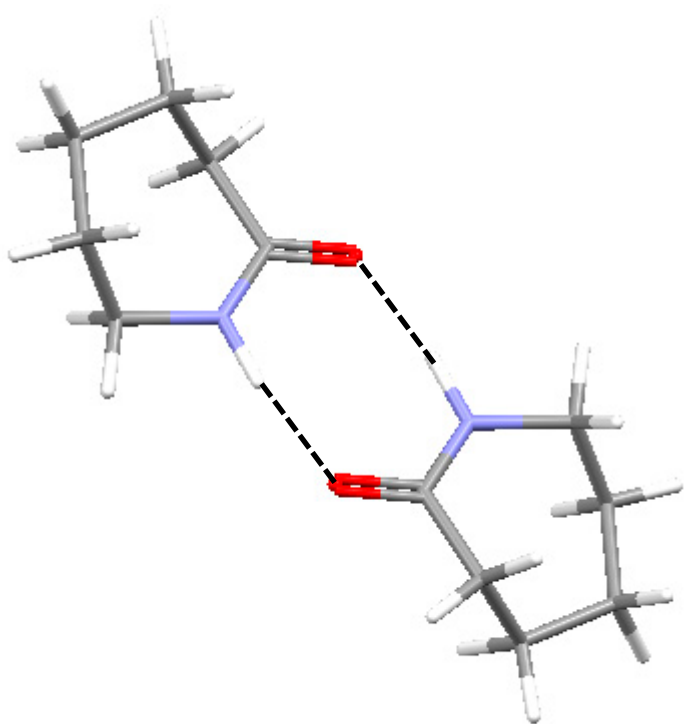

| Distances (Å) at 298-303 K |         |
|----------------------------|---------|
| CCDC refCode               | N-H...O |
| CAPLAC                     | 1.841   |
| CAPLAC16                   | 2.025   |
| CAPLAC17                   | 1.988   |
| JAQVOP                     | 2.108   |
| KEWZUI                     | 1.980   |
| MADSIW                     | 2.133   |
| NUMGUZ                     | 2.131   |
| NUMJAI                     | 2.041   |
| QQQGHM01                   | 1.969   |
| WIXDIS                     | 2.115   |
| Average                    | 2.022   |

**Figure S14:** Overlay of the crystal structures of the different structures before and after optimization steps. N-H...O distances measured are represented.

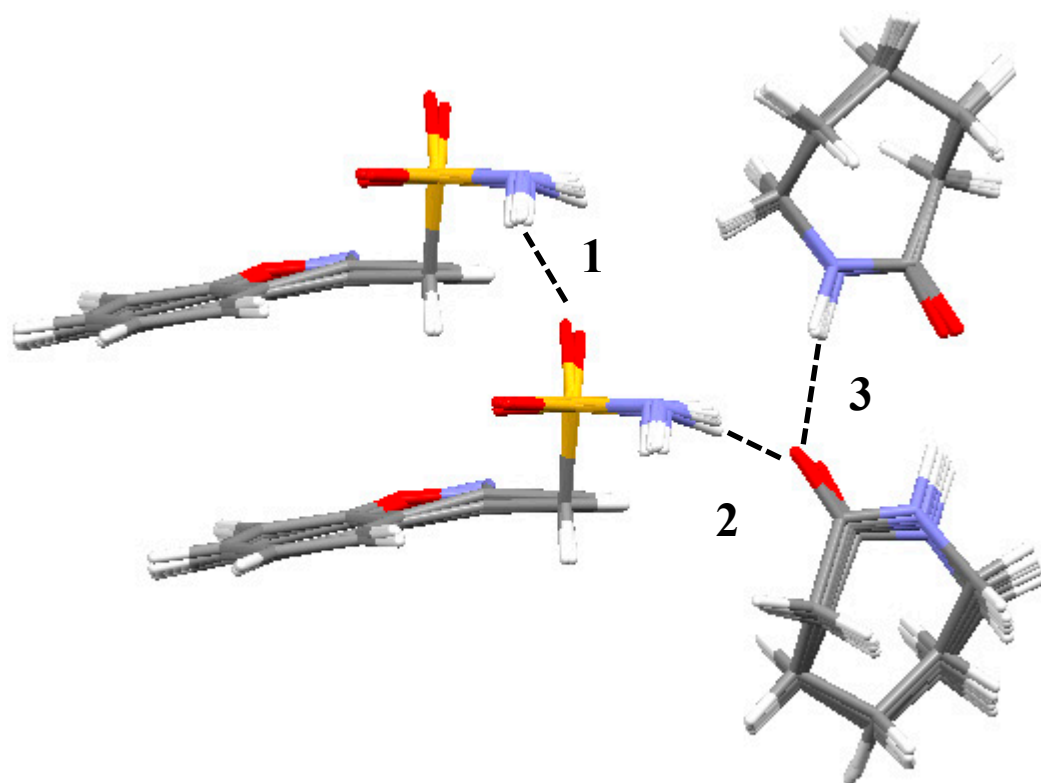

| Distances (Å) N-H...O       |              |              |              |
|-----------------------------|--------------|--------------|--------------|
| structures                  | 1            | 2            | 3            |
| best FOX                    | 2.057        | 2.634        | 2.185        |
| initial optimized structure | 2.057        | 2.634        | 2.185        |
| optimized step 9            | 2.185        | 2.248        | 2.040        |
| optimized step 10           | 2.183        | 2.134        | 2.000        |
| <b>optimized step 11</b>    | <b>2.189</b> | <b>2.084</b> | <b>1.971</b> |
| optimized step 20           | 2.124        | 1.722        | 1.908        |
| CCDC average                | 2.022        |              |              |



**Figure S15:** C-H...O<sub>23</sub> and O<sub>23</sub>...O<sub>23</sub> distances measured for the different structures before and after optimization steps are represented. More relevant Alerts reported from each checkcif are also included.

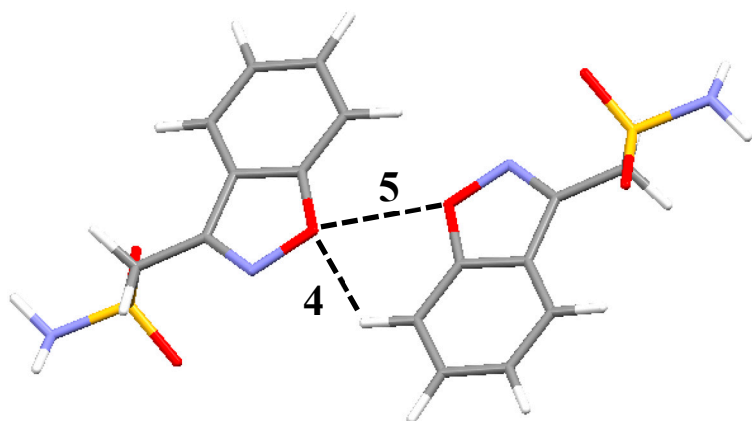

| structures                  | Distances (Å)               |                                           | Checkcif                                                                     |
|-----------------------------|-----------------------------|-------------------------------------------|------------------------------------------------------------------------------|
|                             | CH...O <sub>23</sub><br>(4) | O <sub>23</sub> ...O <sub>23</sub><br>(5) |                                                                              |
| best FOX                    | 2.564                       | 3.057                                     | Alert level C<br>Bond Without Acceptor N <sub>24</sub> -H <sub>35</sub>      |
| initial optimized structure | 2.548                       | 2.975                                     | -                                                                            |
| optimized step 9            | 2.553                       | 2.880                                     | Alert level C<br>Short contact O <sub>23</sub> ...O <sub>23</sub>            |
| optimized step 10           | 2.548                       | 2.867                                     | Alert level C<br>Short contact O <sub>23</sub> ...O <sub>23</sub>            |
| <b>optimized step 11</b>    | <b>2.551</b>                | <b>2.835</b>                              | <b>Alert level B</b><br><b>Short contact O<sub>23</sub>...O<sub>23</sub></b> |
| optimized step 20           | 2.519                       | 2.855                                     | Alert level C<br>Short contact O <sub>23</sub> ...O <sub>23</sub>            |

## 5.- RMSD values

**Figure S16:** The RMS Cartesian displacement of the non-hydrogen atoms for zonisamide and  $\epsilon$ -caprolactam molecules in the asymmetric unit between the DFT-optimized free cell parameters (black) and different structures

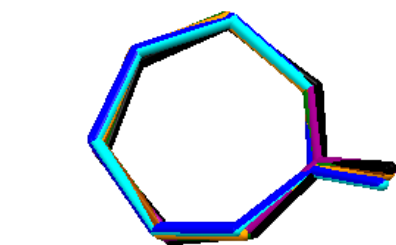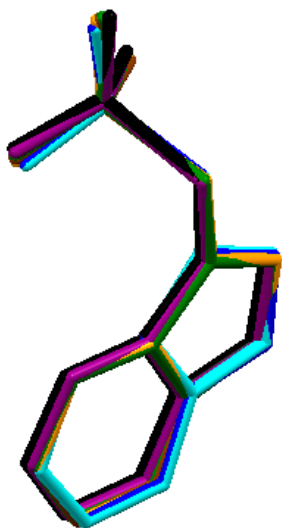

| structures                  | RMSD (Å)            |                                  |
|-----------------------------|---------------------|----------------------------------|
|                             | Zonisamide molecule | $\epsilon$ -Caprolactam molecule |
| best FOX                    | 0.1271              | 0.0282                           |
| initial optimized structure | 0.1229              | 0.0282                           |
| optimized step 9            | 0.0515              | 0.0336                           |
| optimized step 10           | 0.0431              | 0.0289                           |
| optimized step 11           | <b>0.0415</b>       | <b>0.0350</b>                    |
| optimized step 20           | 0.0333              | 0.0305                           |

## 6. QTAIM parameters

**Table S3.** Density ( $\rho$ ),  $\lambda_1$ ,  $\lambda_2$ ,  $\lambda_3$  and Laplacian  $\nabla^2\rho$  of electron density at the bond CPs of the noncovalent contacts of the cocrystal (see Figure 10, main text) in atomic units.

| CP             | $\rho$ | $\lambda_1$ | $\lambda_2$ | $\lambda_3$ | $\nabla^2\rho$ |
|----------------|--------|-------------|-------------|-------------|----------------|
| Figure 10a     |        |             |             |             |                |
| CH $\cdots$ O  | 0.0053 | -0.0045     | -0.0044     | 0.0274      | 0.0186         |
| NH $\cdots$ O  | 0.0314 | -0.0487     | -0.0472     | 0.1984      | 0.1022         |
| NH2 $\cdots$ O | 0.0463 | -0.0808     | -0.0788     | 0.2887      | 0.1291         |
| Figure 10b     |        |             |             |             |                |
| CH $\cdots$ O  | 0.0075 | -0.0068     | -0.0065     | 0.0459      | 0.0326         |
| O $\cdots$ O   | 0.0080 | -0.0076     | -0.0069     | 0.0556      | 0.0410         |
| NH2 $\cdots$ O | 0.0171 | -0.0212     | -0.0204     | 0.1161      | 0.0745         |
| C $\cdots$ O   | 0.0049 | -0.0027     | -0.0018     | 0.0237      | 0.0193         |
| C $\cdots$ N   | 0.0062 | -0.0029     | -0.0020     | 0.0258      | 0.0209         |
